# Supplementary material for: The influence of CpG and UpA dinucleotide frequencies on RNA virus replication and characterization of the innate cellular pathways underlying virus attenuation and enhanced replication
Source: PubMed Central journal article supplement (PMC3985648; doi:10.1093/nar/gku075), 2014-01-25
Supplement: supp_gku075_nar-03011-v-2013-File002.pdf [file supp_gku075_nar-03011-v-2013-File002.pdf]

## Supplementary Data

Table 1

### Primers used in qRT-PCR

| Gene      | Sense                    | Antisense              |
|-----------|--------------------------|------------------------|
| E7 5' UTR | TCCGGCCCCTGAATGCGGCTAA   | CACCCAAAGTAGTCGGTTCCGC |
| GAPDH     | GAAATCCCATCACCATCTTCCAGG | GAGCCCCAGCCTTCTCCATG   |
| ISG15     | GGCGGGCAACGAATTCCAGGTGT  | CTCCCCGACAGGCGCAGATTCA |
| ISG56     | CTTGAGCCTCCTTGGGTTCCG    | GCTGATATCTGGGTGCCTAAGG |
| RIG-I     | TCCAGATGCCAGACAAAGATGAAG | CCTGCTGCTCGGACATTGC    |
| MDA-5     | CGCTATCTCATCTCGTGCTTACG  | TCCAACCAAGGTGCCAGACTC  |
| PKR       | CCCAGATTTGACCTTCTGA      | ACTTGGCCAAATCCACCTG    |

### Nested primers used in sequencing individual viral genomes

| Region      | Virus | Primer type      | Nucleotide position | Sequence                    |
|-------------|-------|------------------|---------------------|-----------------------------|
| 1           | All   | Outer, sense     | 1809                | CCCAATTTGATGTAACACCACACATGG |
| 1           | All   | Inner, sense     | 1835                | GATATTCCAGGCGAAGTACACAACC   |
| 1           | W W   | Outer, antisense | 2343                | CAAAGCACTACACACTTATTTGGAG   |
| 1           | C C   | Outer, antisense | 2382                | ATTCGAACGGAGAAATCGTTAC      |
| 1           | U U   | Outer, antisense | 2388                | TCCCTTAGCATACGTACTGAGAAAT   |
| 1           | W W   | Inner, antisense | 2313                | GCACCACTATTCTGTTTGGT        |
| 1           | C C   | Inner, antisense | 2348                | AACAAAGCACGACGCACTTATT      |
| 1           | U U   | Inner, antisense | 2363                | CATTACAAGCTGATGCAAAACATAG   |
| Un-modified | All   | Outer, sense     | 3210                | TGAGCCCGTACATCAAATCA        |
| Un-modified | All   | Inner, sense     | 3241                | TTTTAACCCACGAACCTGA         |
| Un-modified | All   | Outer, antisense | 3785                | TTGCCGAGTTGTTGACATA         |
| Un-modified | All   | Inner, antisense | 3723                | CAAGTCACGGATGTCTGCAA        |

### Nested primers used in amplification of E7 Region 1 or Region 2 for competition assays

| Region | Primer | Sense                       | Antisense               |
|--------|--------|-----------------------------|-------------------------|
| 1      | Outer  | CCCAATTTGATGTAACACCACACATGG | CCCATACTCGGATGTGCTTGGG  |
| 1      | Inner  | GATATTCCAGGCGAAGTACACAACC   | CACTCGGATTGTGCTTACATCTG |
| 2      | Outer  | CAAGGAGCATACACAGGAATACC     | GAATGTCTGCCTCATCGCCAACT |
| 2      | Inner  | GGTACCTACTCTTAGGCAAGCA      | AAGCTGGACGCTTCAATGAGCCT |

**Table S2**

Enzymes used in selective digests for competition assays

| <b>Virus 1</b>                            | <b>Virus 2</b> | <b>Region amplified</b> | <b>Enzyme</b> | <b>Restriction site</b> |
|-------------------------------------------|----------------|-------------------------|---------------|-------------------------|
| <b>Individual competition experiments</b> |                |                         |               |                         |
| W W                                       | P P            | 2                       | HindIII       | In R1/R2 Permuted       |
| W W                                       | C C            | 1                       | BamHI         | In R1/R2 CpG-high       |
| W W                                       | U U            | 2                       | ScaI          | In R1/R2 UpA-high       |
| W W                                       | c c            | 2                       | SphI          | In R1/R2 CpG-low        |
| W W                                       | u u            | 2                       | EcoRV         | In WT                   |
| <b>Pairwise competition experiments</b>   |                |                         |               |                         |
| W W                                       | P P            | 2                       | HindIII       | In R1/R2 Permuted       |
| W W                                       | cu W           | 1                       | EcoRV         | In WT                   |
| W W                                       | W cu           | 2                       | EcoRV         | In WT                   |
| W W                                       | c c            | 2                       | EcoRV         | In R1/R2 CpG-low        |
| W W                                       | u u            | 2                       | EcoRV         | In WT                   |
| W W                                       | cu cu          | 2                       | SphI          | In WT                   |
| P P                                       | cu W           | 1                       | SphI          | In R1/R2 Permuted       |
| P P                                       | W cu           | 2                       | HindIII       | In R1/R2 Permuted       |
| P P                                       | c c            | 2                       | HindIII       | In R1/R2 Permuted       |
| P P                                       | u u            | 2                       | HindIII       | In R1/R2 Permuted       |
| P P                                       | cu cu          | 2                       | HindIII       | In R1/R2 Permuted       |
| cu W                                      | W cu           | 1                       | EcoRV         | R2 CpG/UpA-low          |
| cu W                                      | c c            | 2                       | SphI          | In R1/R2 CpG-low        |
| cu W                                      | u u            | 2                       | EcoRV         | In R1 CpG/UpA-low       |
| cu W                                      | cu cu          | 2                       | EcoRV         | In R1 CpG/UpA-low       |
| W cu                                      | c c            | 2                       | EcoRV         | In R1/R2 CpG-low        |
| W cu                                      | u u            | 2                       | SphI          | In R2 CpG/UpA-low       |
| W cu                                      | cu cu          | 1                       | EcoRV         | In R2 CpG/UpA-low       |
| c c                                       | u u            | 2                       | EcoRV         | In R1/R2 CpG-low        |
| c c                                       | cu cu          | 2                       | EcoRV         | In R1/R2 CpG-low        |
| u u                                       | cu cu          | 2                       | SphI          | In R1/R2 CpG/UpA-low    |

**Table S3**

Nucleotide substitutions observed after sequencing individual passage 1 virus genomes.

| <b>Virus</b>   | <b>Region</b> | <b>kb sequenced</b> | <b>Changes observed</b> | <b>Nucleotide position</b> | <b>Type</b>                          | <b>Changes in CpG/UpA</b> |
|----------------|---------------|---------------------|-------------------------|----------------------------|--------------------------------------|---------------------------|
| E7 WT          | 1             | 7                   | None                    |                            |                                      |                           |
| E7 WT          | Un-modified   | 8.5                 | None                    |                            |                                      |                           |
| R1/R2 CpG high | 1             | 7.5                 | C→A                     | 1963                       | Synonymous                           | None                      |
| R1/R2 CpG high | Un-modified   | 7.5                 | A→C<br>C→U              | 3665<br>3247               | Synonymous<br>Synonymous             | CpG created<br>None       |
| R1/R2 UpA high | 1             | 8                   | A→G<br>U→C              | 2275<br>2193               | Synonymous<br>Non-synonymous:<br>M→T | None<br>CpG created       |
| R1/R2 UpA high | Un-modified   | 7.5                 | None                    |                            |                                      |                           |

**Figure S1**

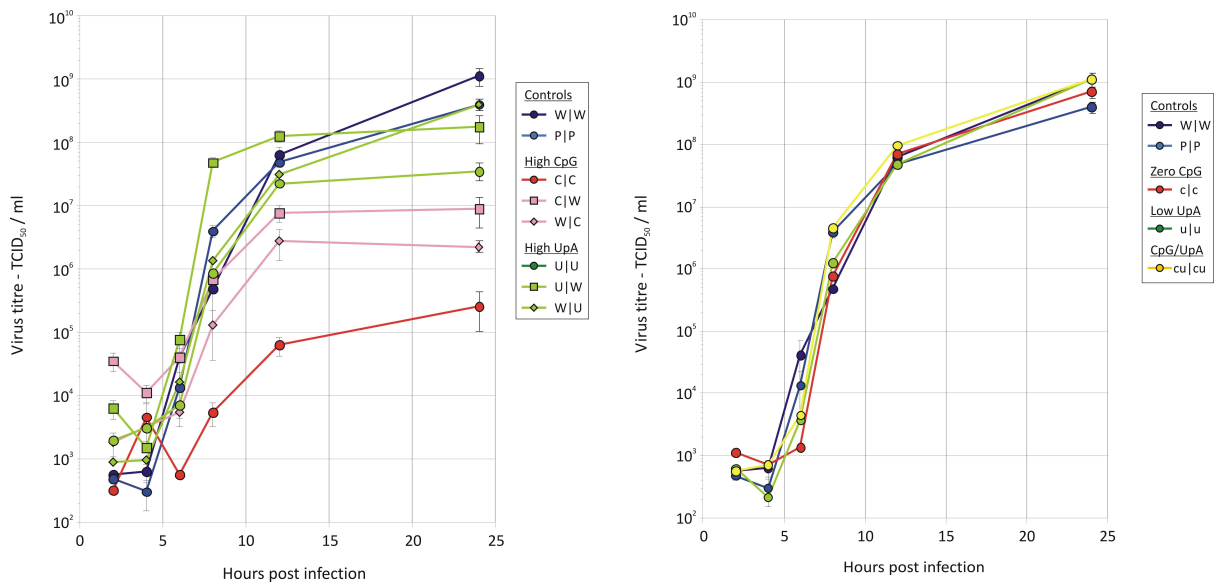

**Single-step replication assay for E7 and mutant viruses.** RD cells were infected with E7 WT, Permuted, CpG/UpA-high mutants (**A**) or CpG/UpA-low mutants (**B**) at an MOI of 10. Infectious titre of supernatants was measured at different time points by TCID<sub>50</sub> titrations. Data points are the mean of three biological replicates (SEMs shown by error bars).

**Figure S2**

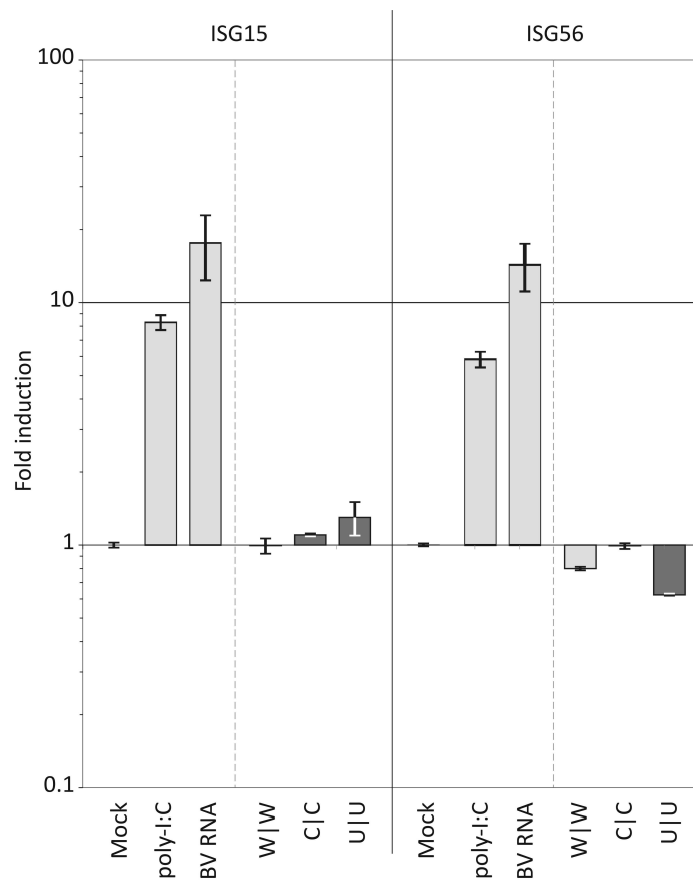

**Expression of ISG15 and ISG56 following infection with WT or mutant virus.** Gene expression was analysed by qRT-PCR 8 hours following infection with E7, C|C or U|U mutants at an MOI of 10. Poly I:C was transfected as a positive control. Expression is normalised to GAPDH and is shown relative to the E7 WT value. Results are the mean and standard error of two biological replicates.

**Figure S3**

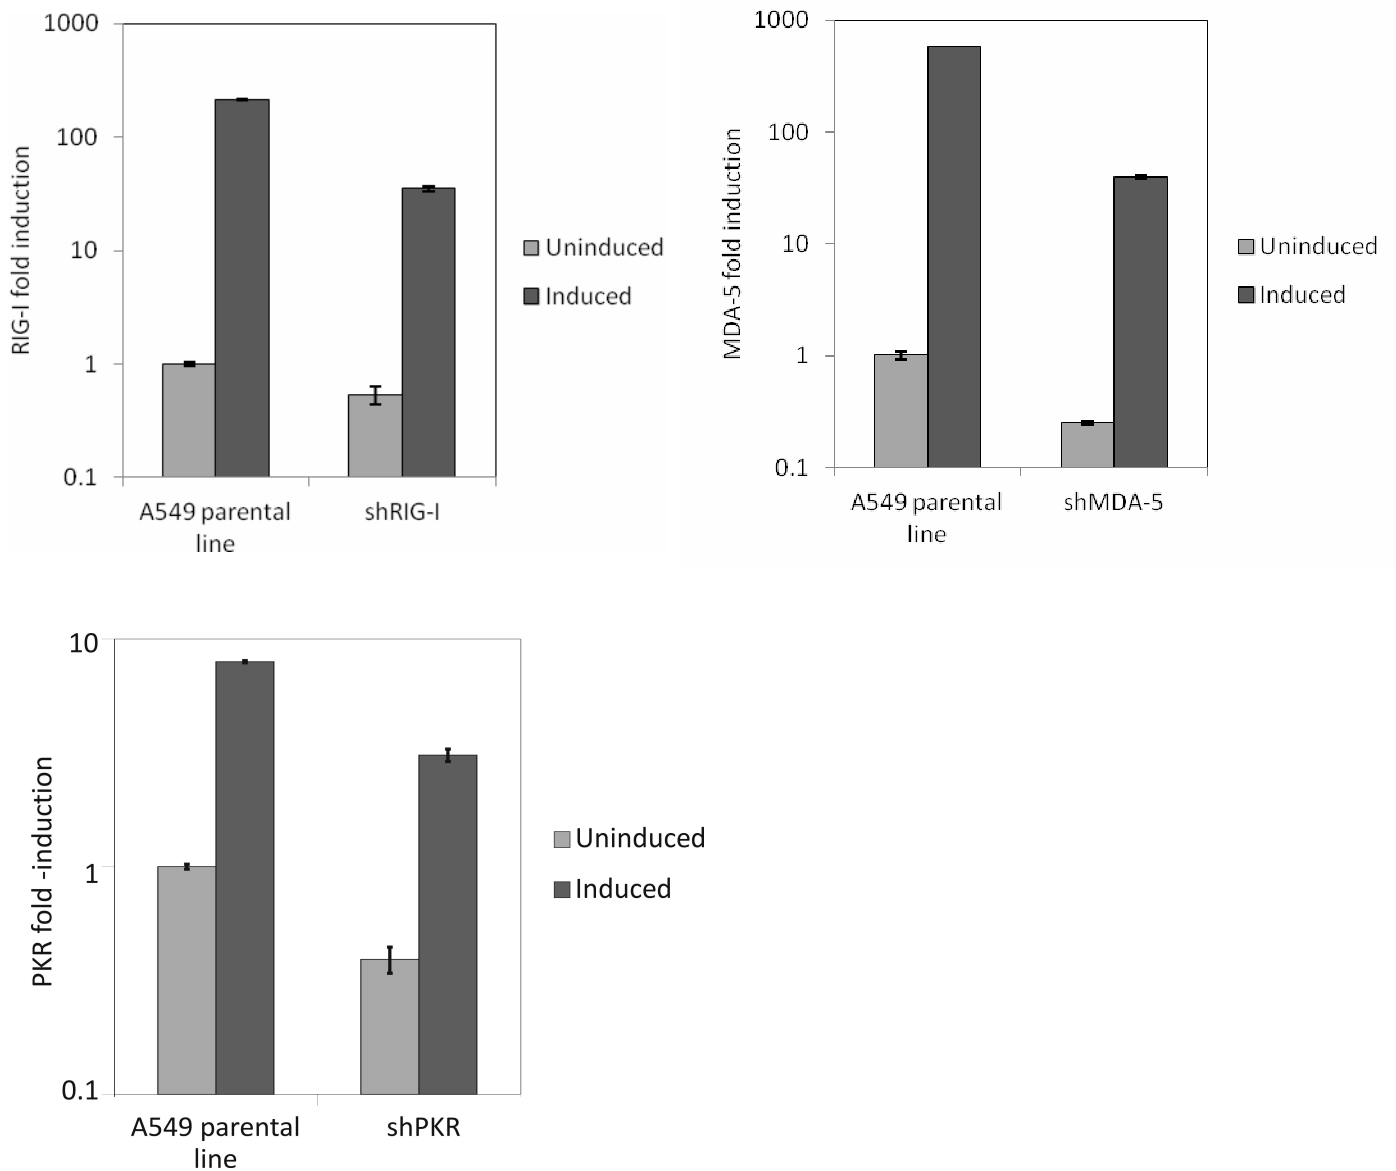

**Expression of RIG-I, MDA-5 and PKR in induced and uninduced shRNA lines.** Cell lines expressing RIG-I, MDA-5 or PKR shRNAs, as well as the parental A549 cell line, were transfected with Poly I:C for 8 hours and the relative expression levels of the targeted gene quantified using qRT-PCR. Expression was normalised against GAPDH and is shown relative to the uninduced parental cell line value. Results are the mean and standard error of two technical replicates.

**Figure S4**

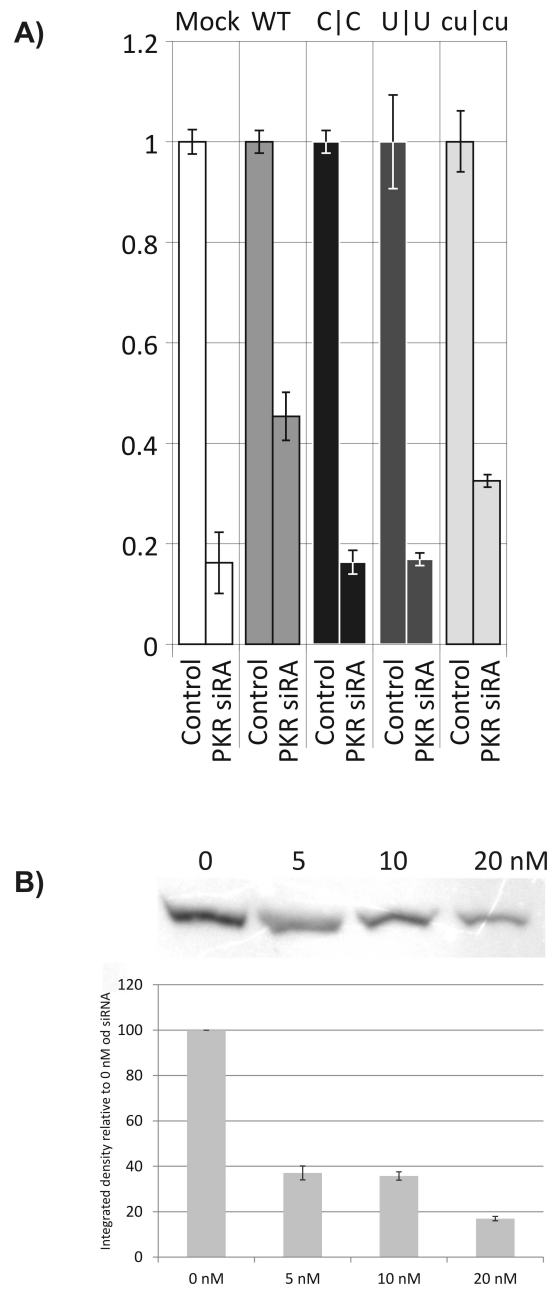

A) Reduction in PKR mRNA levels by 44 hour pre-treatment with PKR siRNA; reductions shown relative to pre-treatment with a validated non-targeted control siRNA. Reductions in PRK mRNA expression were observed irrespective of whether cells were infected with E7 or not.

B) Detection of PKR by Western blot in cell treated with PKR siRNA. Cells were transfected with siRNAs to PKR and incubated for 48 hours. Equal amounts of protein in cell lysates were blotted and detected using a PKR specific mAB followed by anti-rabbit HRP conjugated antibodies and ECL detection. Band densities were measured for two independent experiments. A dose-dependent reduction of protein expression by up to 83% (20nM) was observed.
